# Supplementary material for: Genome-wide CRISPR/Cas9 knockout screening uncovers a novel inflammatory pathway critical for resistance to arginine-deprivation therapy
Source: PubMed Central journal article supplement (PMC7914361; doi:10.7150/thno.51795), 2021-01-25
Supplement: thnov11p3624s1.pdf [file thnov11p3624s1.pdf]

Figure S1

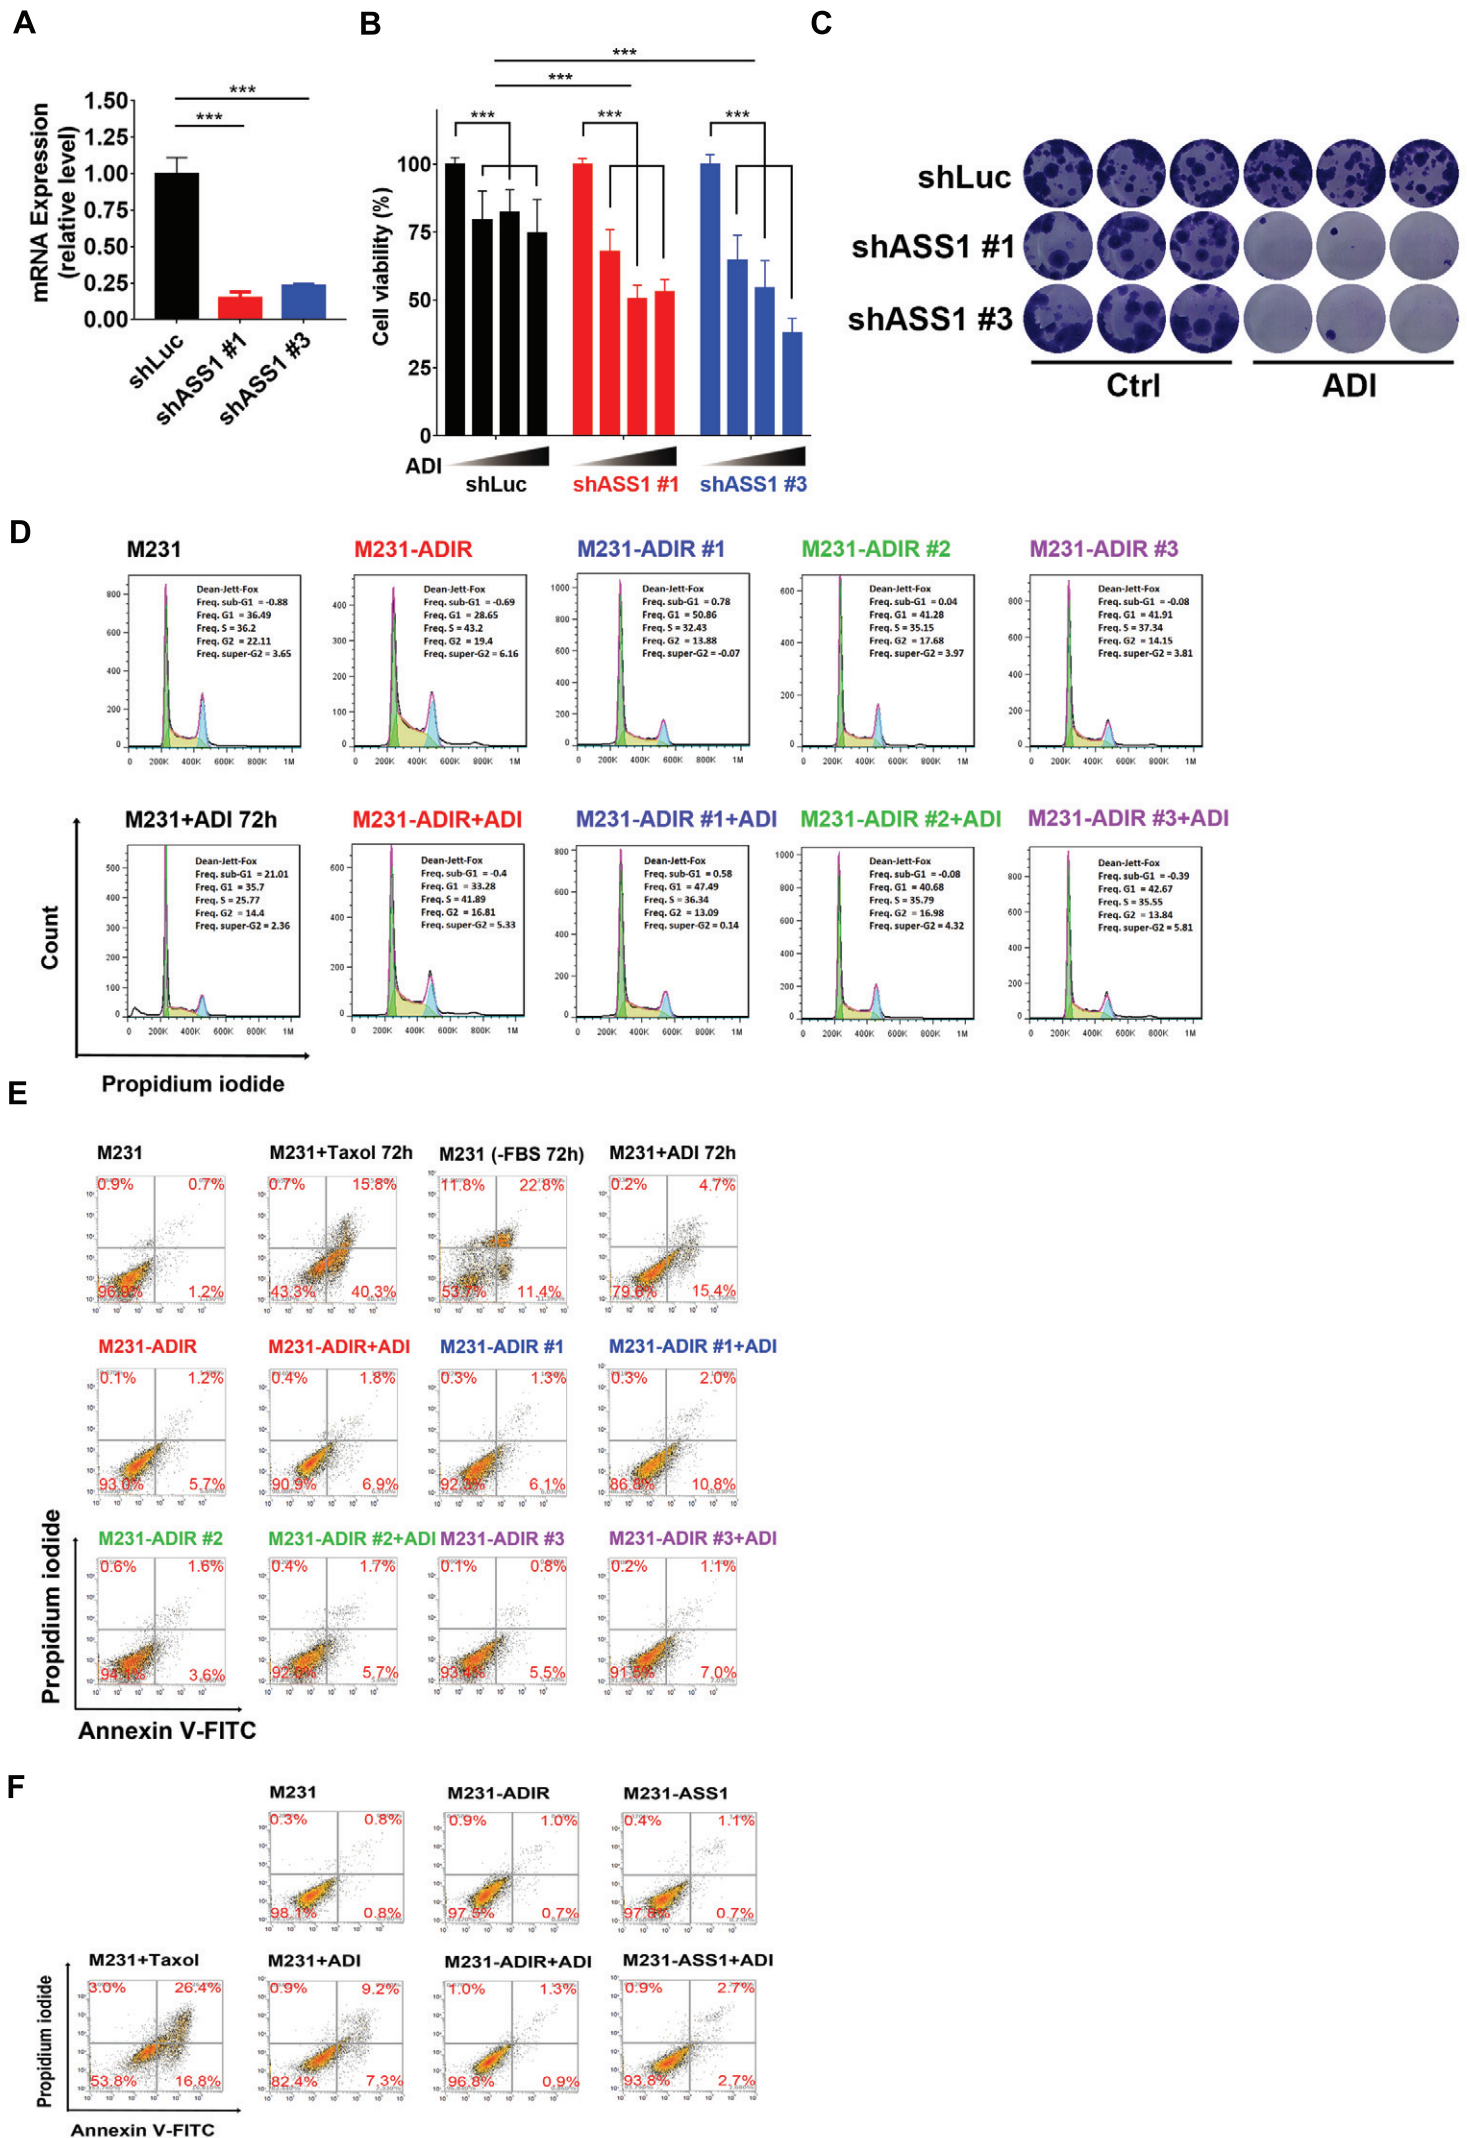

Figure S2

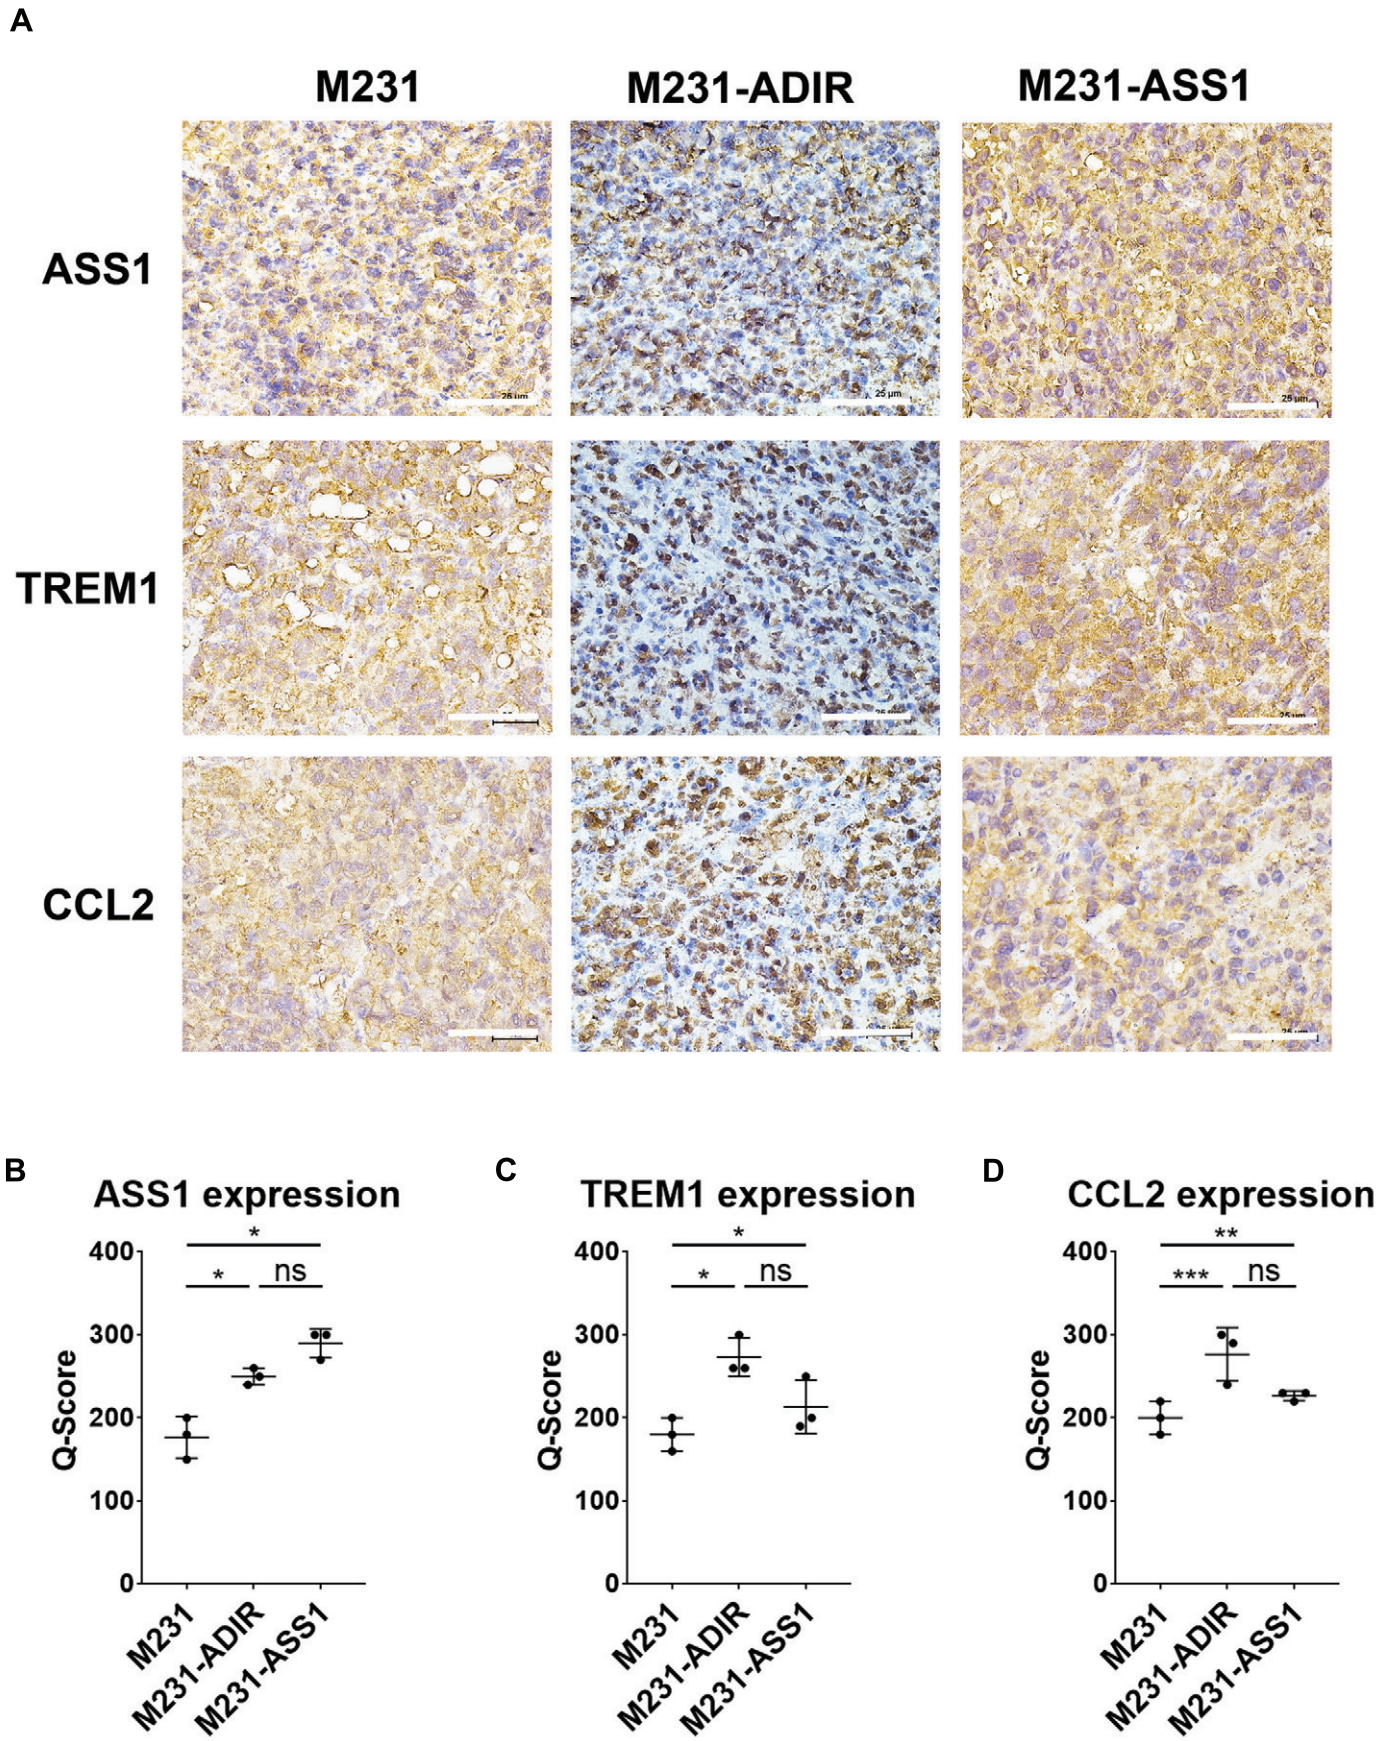



Figure S3

A

## Pathways involved in M231-ASS1 cells

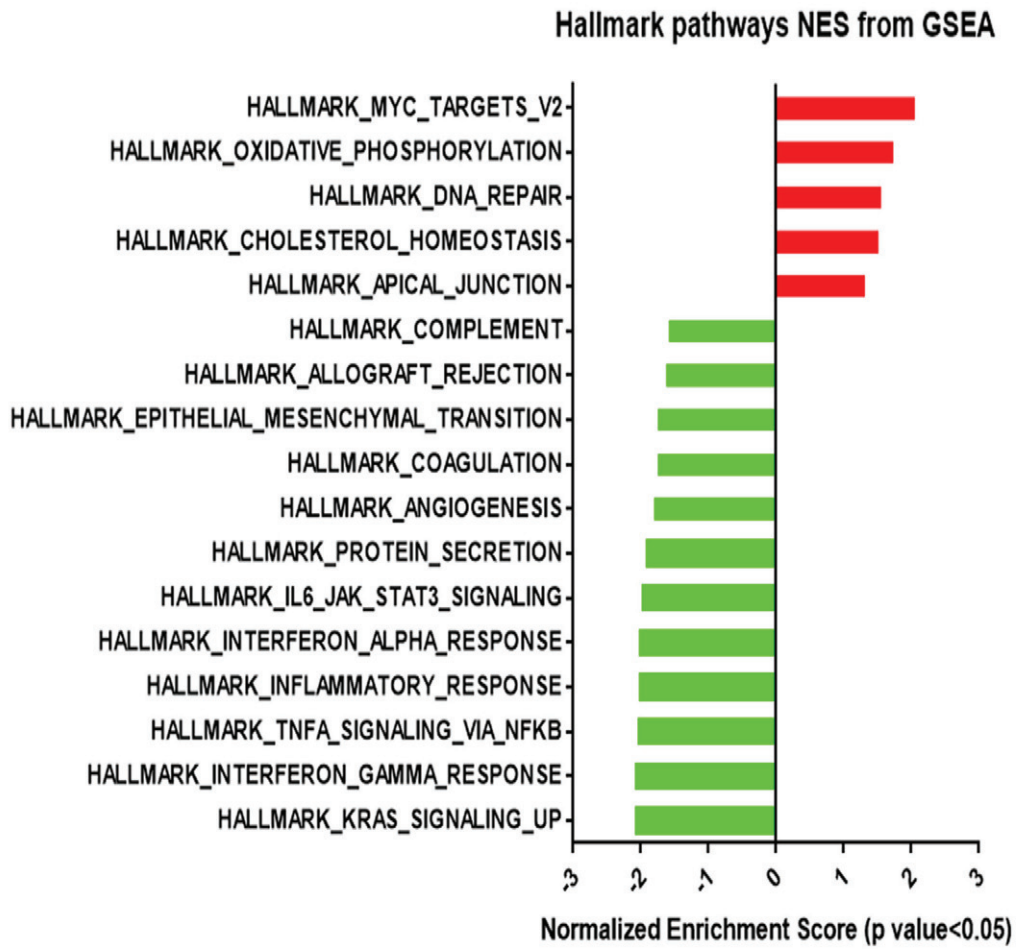

Figure S4

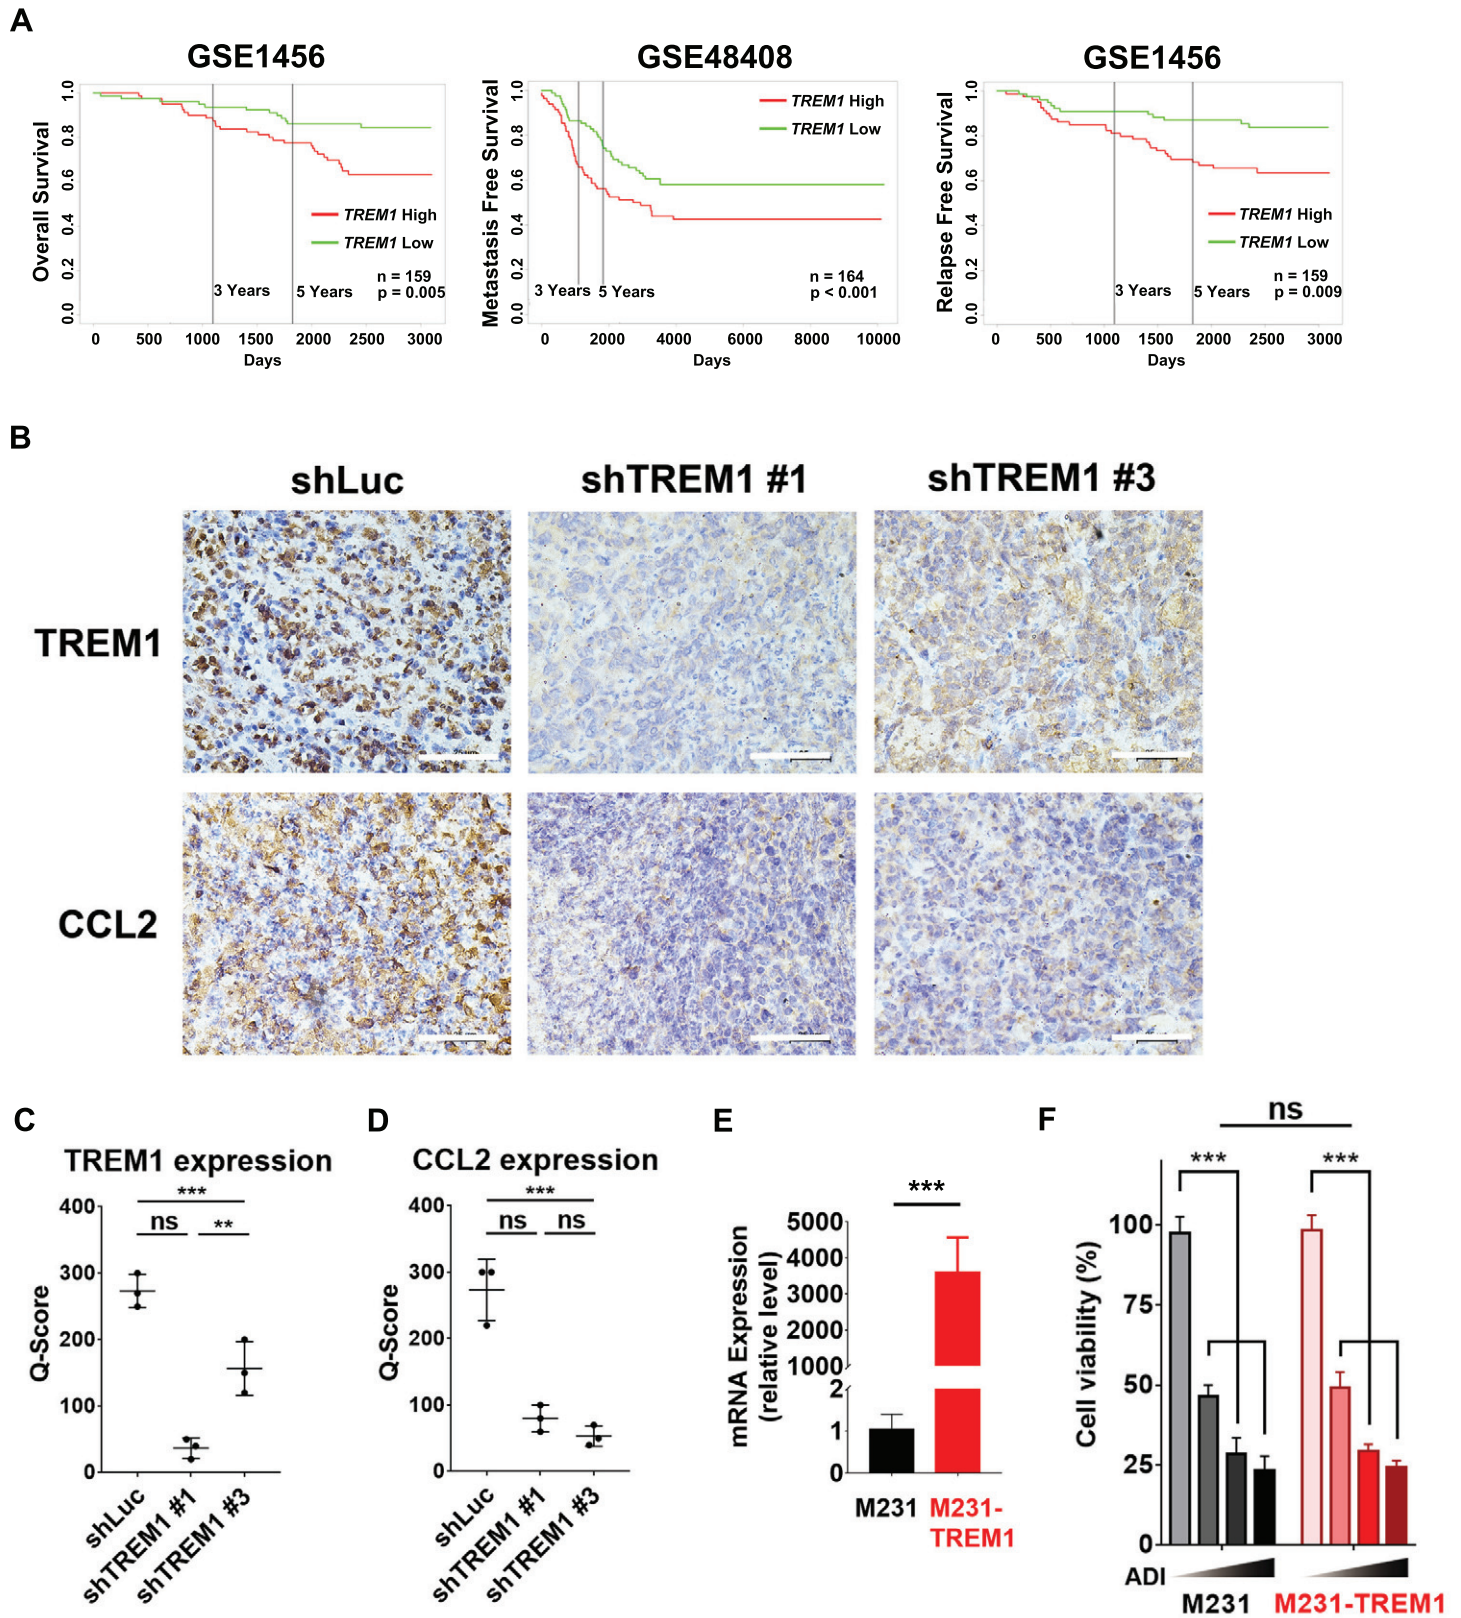



Figure S5

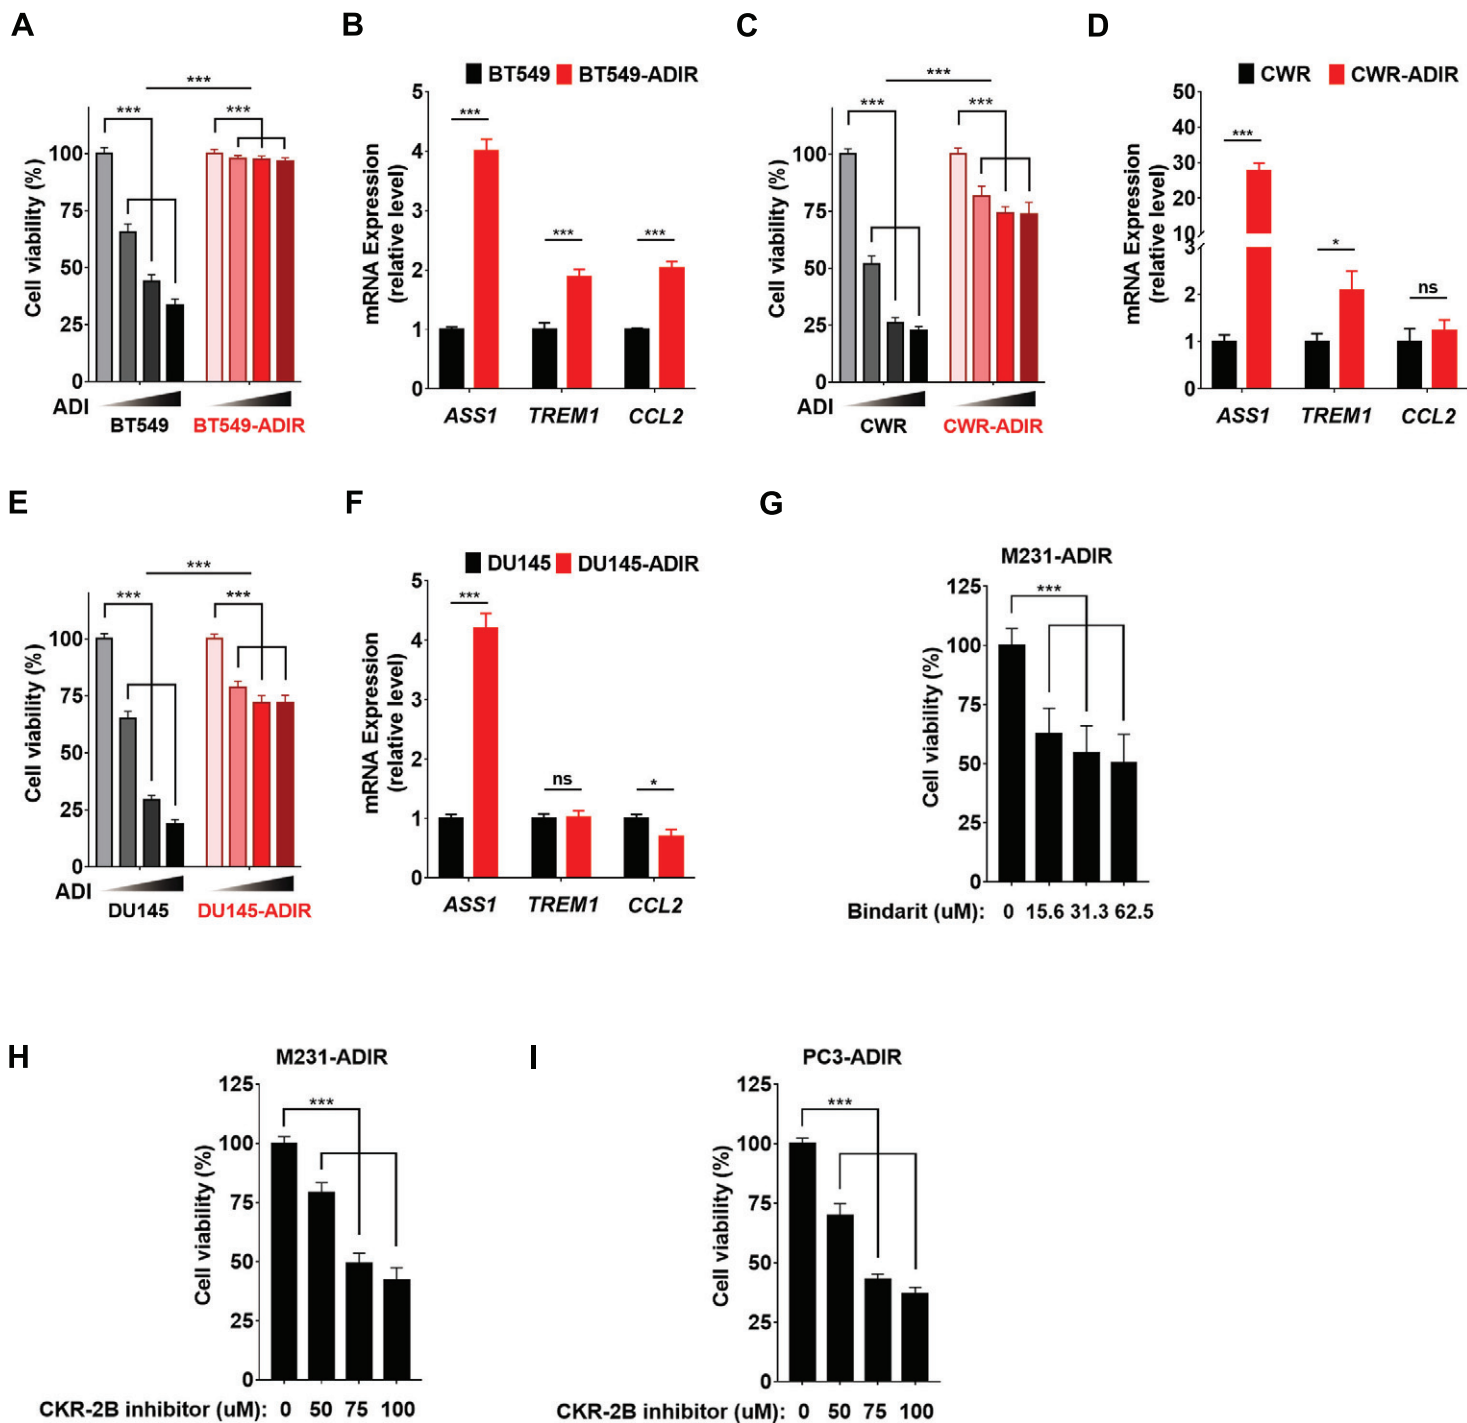

Figure S6

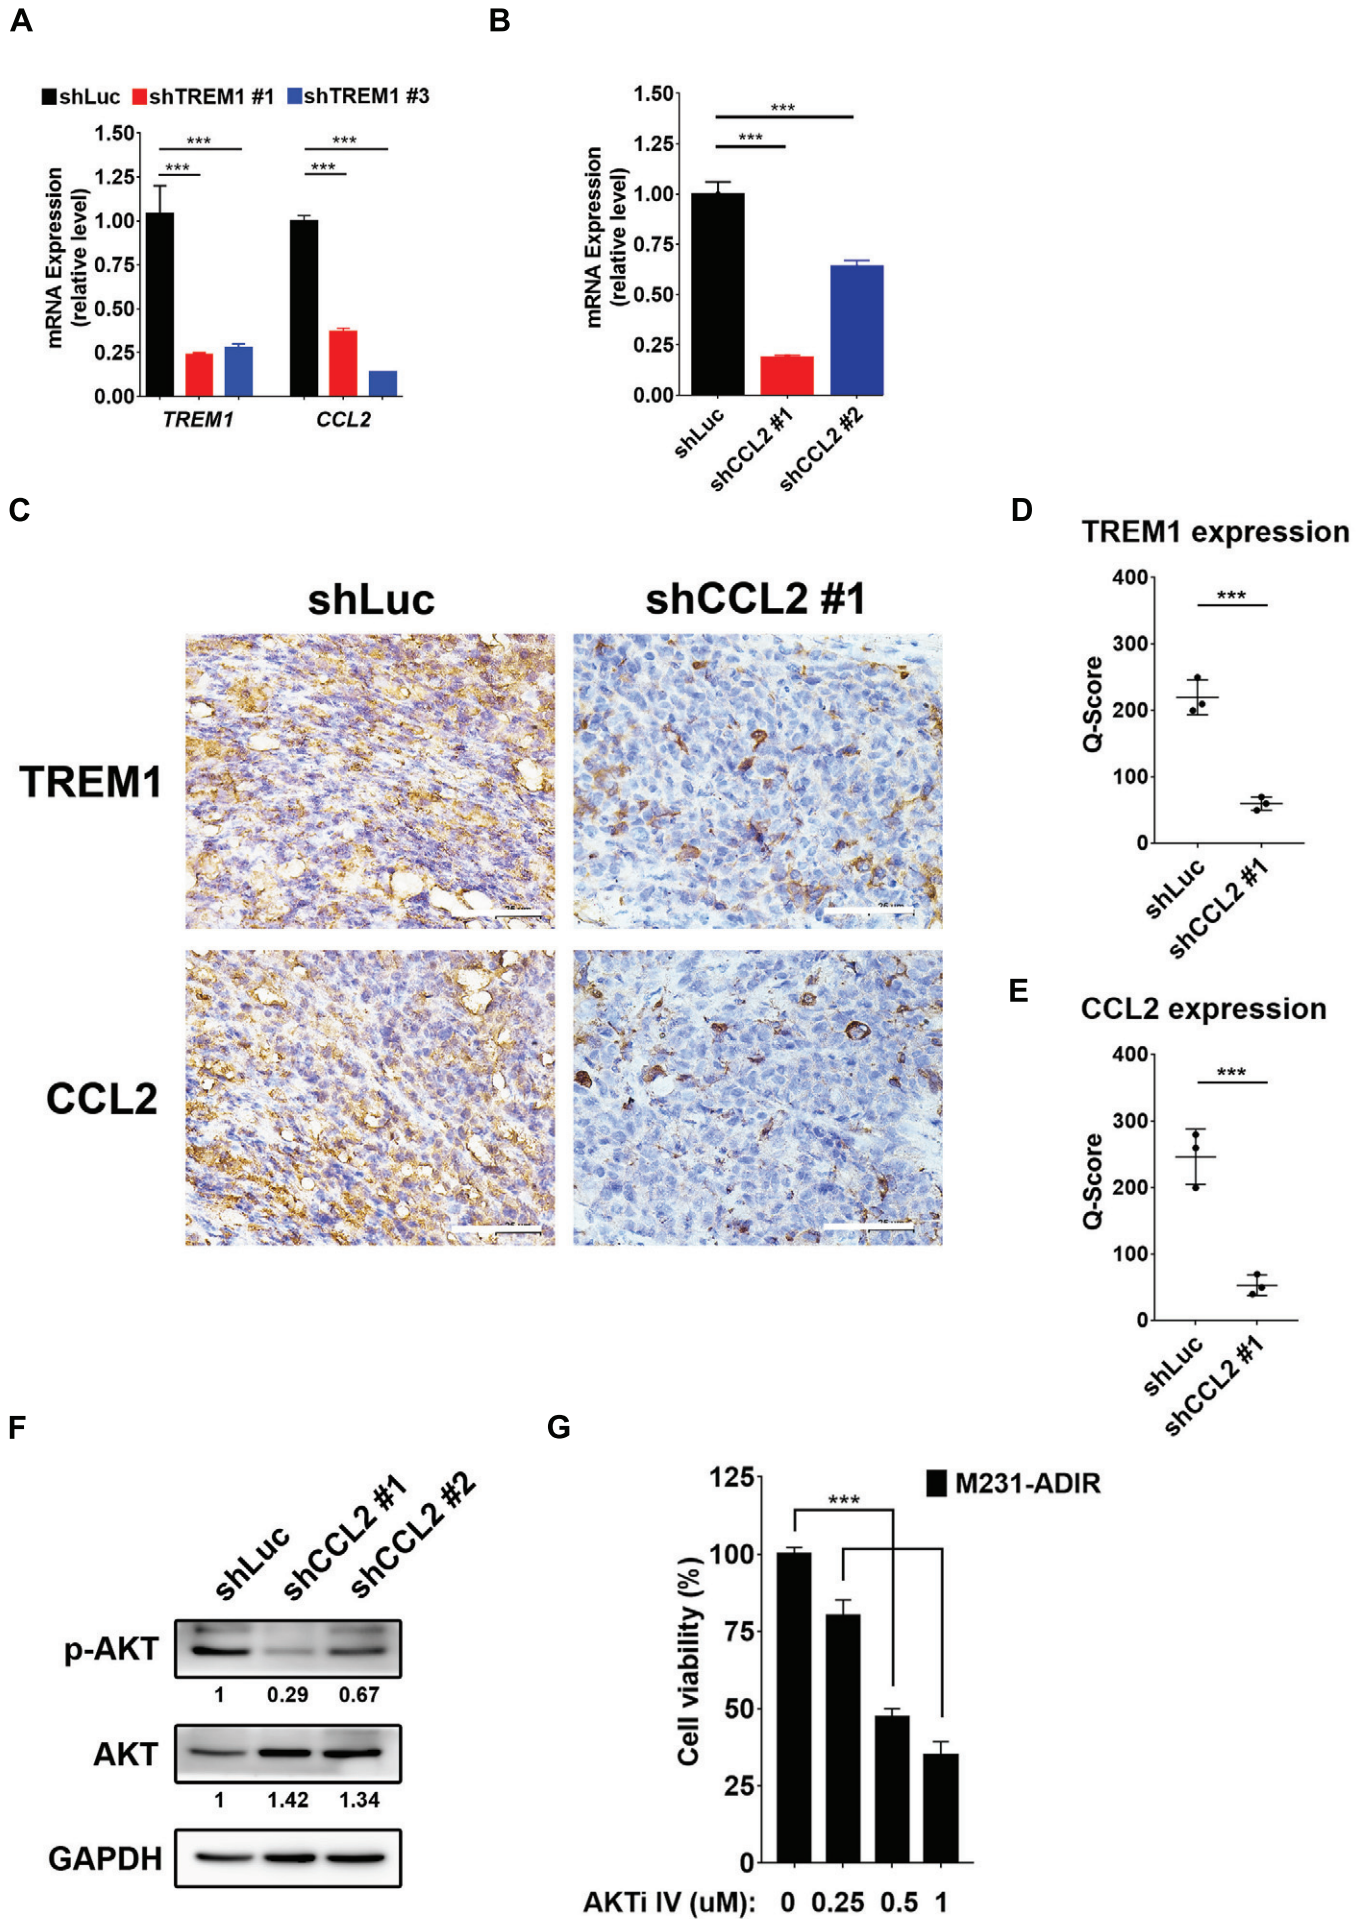



Figure S7

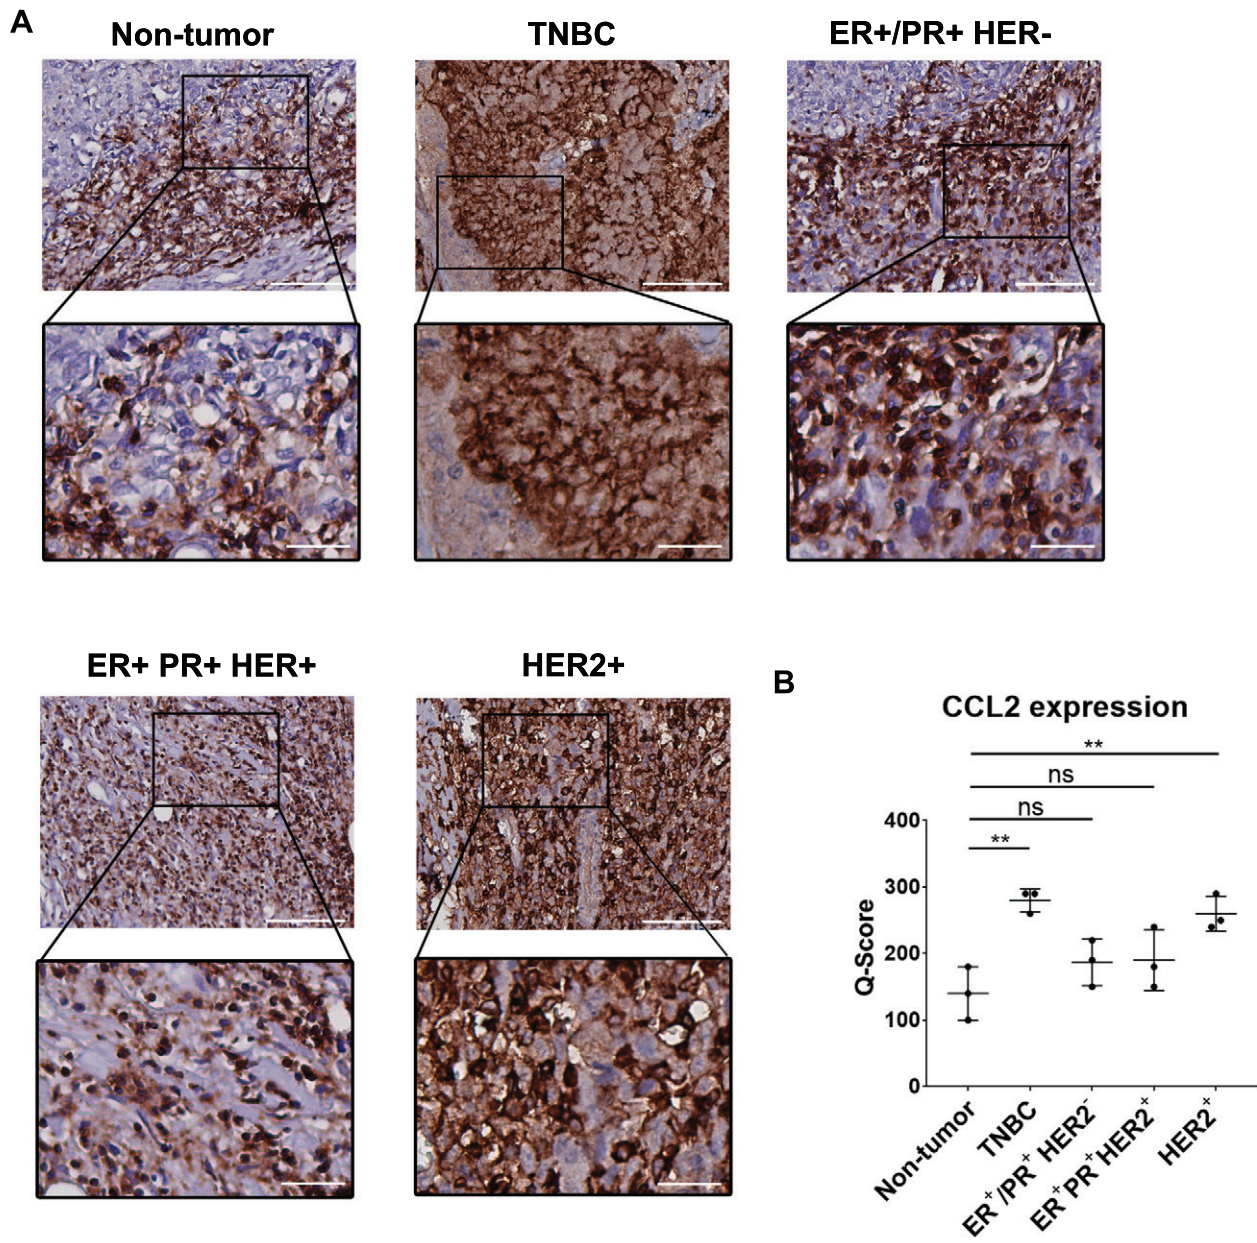

Figure S8

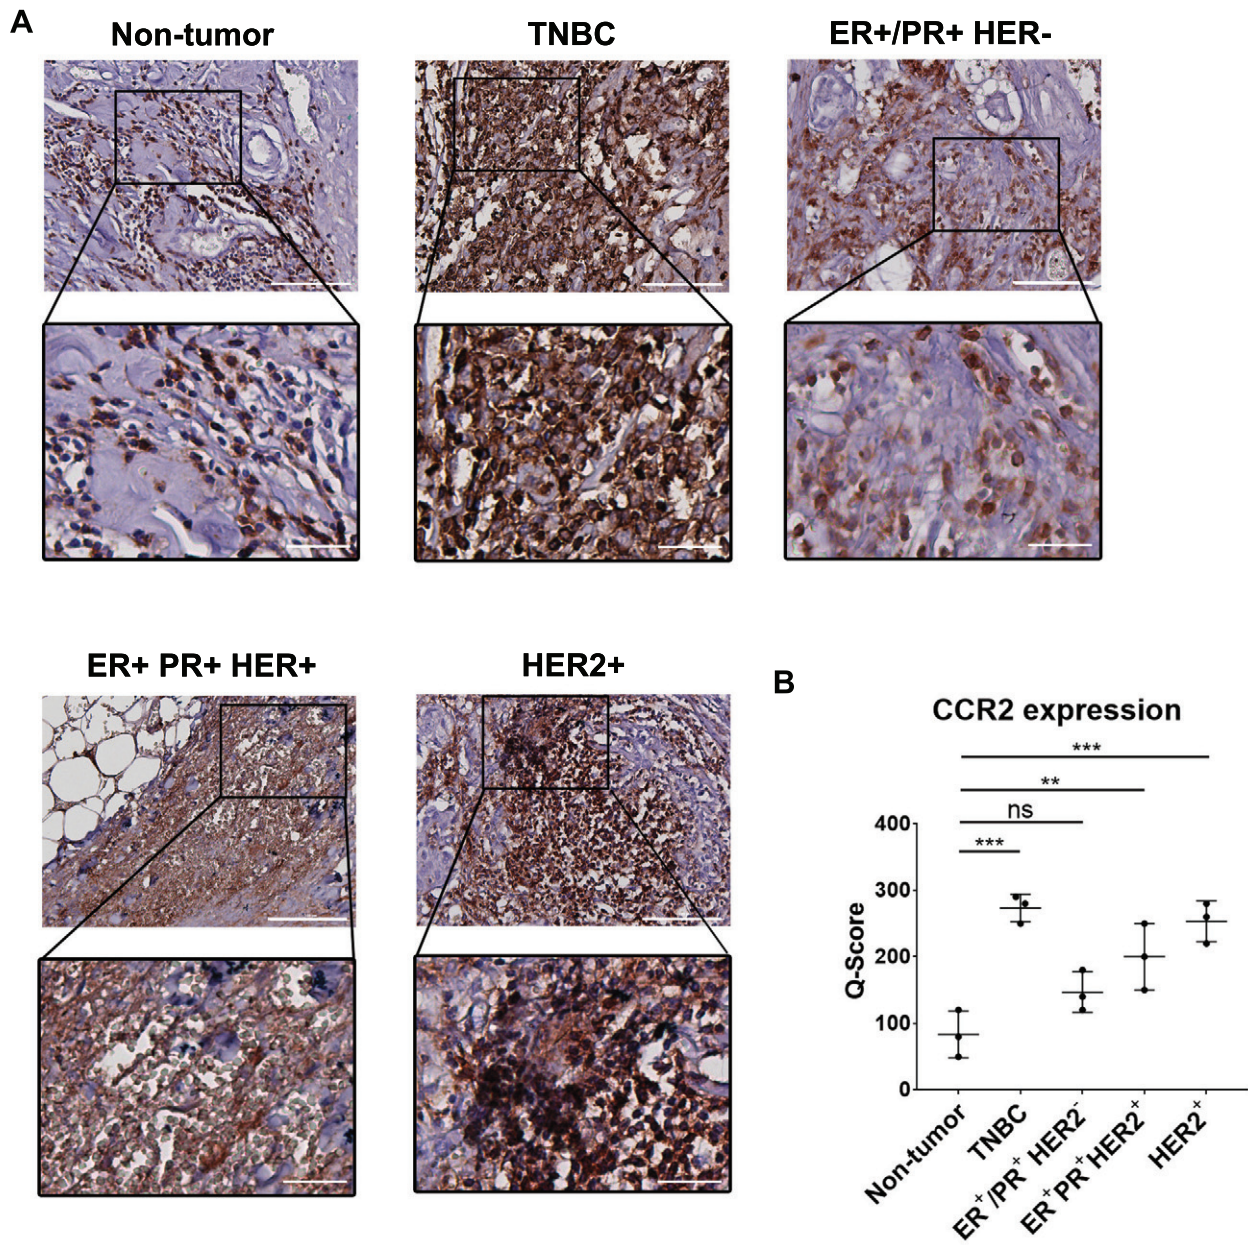



Figure S9

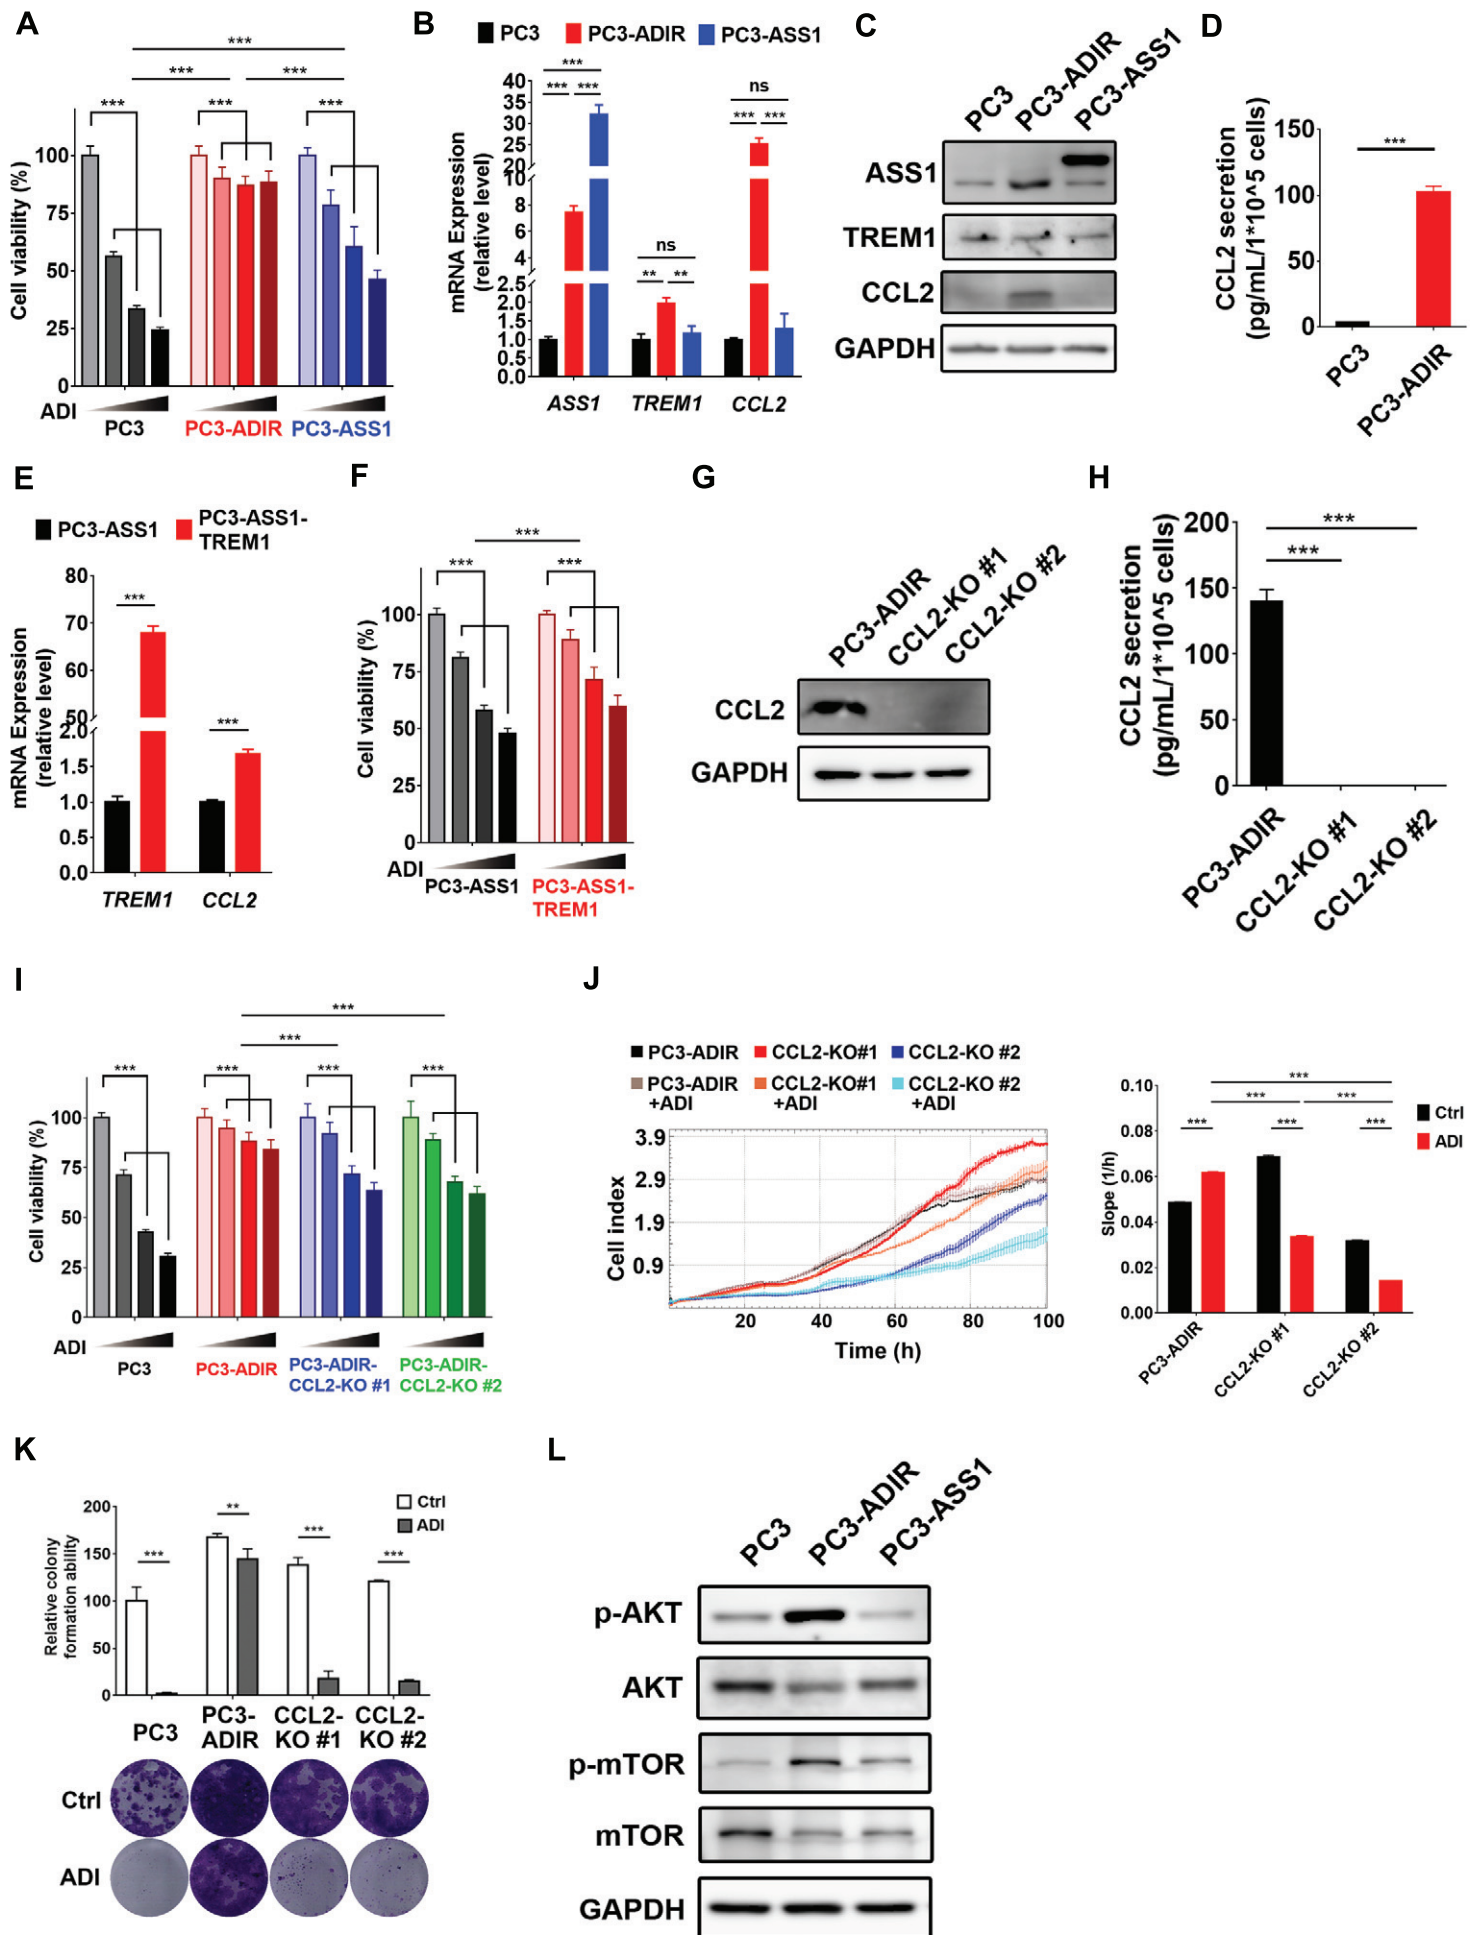

**Table S1. Primers used for real-time PCR**

| <b>Gene</b> | <b>QPCR primer sequence</b>                           |
|-------------|-------------------------------------------------------|
| RPLP0       | Forward sequence 5'-TGG TCA TCC AGC AGG TGT TCG A-3'  |
|             | Reverse sequence 5'-ACA GAC ACT GGC AAC ATT GCG G-3'  |
| ASS1        | Forward sequence 5'-GAG GAT GCC TGA ATT CTA CA-3'     |
|             | Reverse sequence 5'-GTT GGT CAC CTT CAC AGG-3'        |
| CCL2        | Forward sequence 5'-AGA ATC ACC AGC AGC AAG TGT CC-3' |
|             | Reverse sequence 5'-TCC TGA ACC CAC TTC TGC TTG G-3'  |
| TREM1       | Forward sequence 5'-CGA TGT CTC CAC TCC TGA CTC T-3'  |
|             | Reverse sequence 5'-CAG CAA ACA GGA CAG AGA AGA CC-3' |

**Table S2. shRNA clones used in this study**

| <b>TRC clone</b> | <b>Clone ID</b> | <b>Target sequence</b> |
|------------------|-----------------|------------------------|
| pLKO-shTREM1 #1  | TRCN0000056753  | CCGGTGTTC AACATTGTCATT |
| pLKO-shTREM1 #3  | TRCN0000373808  | GGCAGACCCTGGATGTGAAAT  |
| pLKO-shASS1 #1   | TRCN0000440576  | CCCAAGTACAGGCGCTAATTG  |
| pLKO-shASS1 #2   | TRCN0000443685  | ACGCAAAGCAACACGGGATTC  |
| pLKO-shCCL2 #1   | TRCN0000006279  | GATGTGAAACATTATGCCTTA  |
| pLKO-shCCL2 #2   | TRCN0000006280  | GCTGTTATAACTTCACCAATA  |
| pLKO-shAKT1      | TRCN0000288786  | GATCCTCAAGAAGGAAGTCAT  |
| pLKO-shSTAT3 #1  | TRCN0000020843  | GCAAAGAATCACATGCCACTT  |
| pLKO-shSTAT3 #2  | TRCN0000020842  | GCACAATCTACGAAGAATCAA  |



**Table S3. Antibodies used for western blotting**

| <b>Antibody</b>                              | <b>Catalog number</b> | <b>Manufacturer</b>       |
|----------------------------------------------|-----------------------|---------------------------|
| Phospho-Stat3 (Tyr705)                       | 9145                  | Cell Signaling Technology |
| Stat3                                        | 4904                  | Cell Signaling Technology |
| Phospho-AKT (Ser473)                         | 9271                  | Cell Signaling Technology |
| AKT                                          | 9272                  | Cell Signaling Technology |
| Phospho-p44/42 MAPK (Erk1/2) (Thr202/Tyr204) | 4370                  | Cell Signaling Technology |
| p44/42 MAPK (Erk1/2)                         | 9102                  | Cell Signaling Technology |
| Phospho-MTOR (Ser2448)                       | 2971                  | Cell Signaling Technology |
| MTOR                                         | 2972                  | Cell Signaling Technology |
| Cleaved Caspase-3 (Asp175)                   | 9664                  | Cell Signaling Technology |
| Caspase-3                                    | 9662                  | Cell Signaling Technology |
| ASS1                                         | ab77590               | Abcam                     |
| CCL2                                         | ab214819              | Abcam                     |
| TREM1                                        | 314902                | Biolegend                 |
